# Supplementary material for: Constructing FeTe2 nanoparticles embedded in N-doped carbon nanofiber composites as a long-life and high-rate anode material for sodium-ion batteries
Source: Royal Society of Chemistry journal article supplement (doi:10.1039/d3se01464a), 2024-01-01
Supplement: d3se01464a1.pdf [file d3se01464a1.pdf]

**Constructing FeTe<sub>2</sub> dot embed in N-doped carbon nanofibers composite as long-life and high-rate anode material for sodium-ion battery**

Zihua Lin, Haiyan Zhang\*, Changsheng Yang, Zhenjiang Liu, Daofeng Wen, Xiang Peng, Shengkai Li,

School of Materials and Energy, Guangdong University of Technology, Guangzhou, 510006, China.

**Experimental**

**Materials synthesis**

In short, this study began by dissolving 0.8 g of C<sub>4</sub>H<sub>7</sub>FeO<sub>5</sub>·nH<sub>2</sub>O and 1.5 g of polyacrylonitrile (PAN) in 10 mL of dimethylformamide (DMF), followed by 12 hours of stirring to create a homogeneous spinning solution. Various parameters were adjusted: the voltage, temperature, feeding rate, and the distance between the syringe needle and the collection device were set at 12 kV, 45°C, 0.045 mm/min, and 13 cm, respectively. Next, the precursor film obtained from this solution was subjected to a series of steps. It was initially dried overnight at 80°C and then stabilized in air for 90 minutes at 200°C, with a heating rate of 5°C minute<sup>-1</sup>. Following this, the stabilized film was blended with tellurium powders in a 1:1 mass ratio and further annealed at 600°C for 5 hours, again with a heating rate of 5°C minute<sup>-1</sup>. This annealing process was conducted within a tube furnace under a N<sub>2</sub> atmosphere. The end result was the creation of N-doped carbon fibers containing embedded FeTe<sub>2</sub> nanoparticles. For comparison, we also prepared Pure FeTe<sub>2</sub> through direct annealing and tellurization of iron acetate under

identical conditions but without the use of electrospinning. Additionally, bare carbon nanofibers (CNF) were produced through electrospinning PAN and subsequent annealing under the same conditions.

### **Materials characterization**

The physical phases of the prepared samples were investigated by X-ray diffraction (XRD, Bruker D8 Advance, Germany). The morphology and internal structure of the samples were examined by field emission scanning electron microscopy (SEM, SU8010, Hitachi, Japan) and transmission electron microscopy (TEM, Talos F200S, FEI, Czech Republic). The elemental content of FeTe<sub>2</sub>/CNFs was analyzed by x-ray energy spectrometry (EDS). The carbon content in FeTe<sub>2</sub>/CNFs was analyzed by thermogravimetric analysis (TGA, DSC3+, Mettler Toledo, Switzerland) at a heating rate of 10 °C min<sup>-1</sup> from room temperature to 900 °C in air. X-ray photoelectron spectroscopy (XPS) testing was performed using a multifunctional photoelectron spectrometer (ESCALAB 250Xi, Thermo Fisher, USA). Raman spectra were collected using a miniature Raman spectrometer (Renishaw RM2000, UK) with a laser excitation wavelength of 532 nm.

### **Electrochemical Measurements**

Firstly, a black electrode paste was created by mixing the active material (FeTe<sub>2</sub>/CNFs), conductive material (acetylene black), and binder (polyvinylidene fluoride) with N-methyl-2-pyrrolidone solvent in an 8:1:1 mass ratio. This paste was uniformly applied onto copper foil and then vacuum-dried at 80 °C for 12 hours. Subsequently, the dried electrode material was cut into electrode disks with a 10 mm

diameter. Each electrode had an active material mass loading of 0.7-0.9 mg. The coin-type half-cells (CR2032) were assembled in an argon-filled glove box at room temperature, with a sodium metal sheet serving as the reference electrode. A glass fiber separator (Whatman, GF/D) was used, and the electrolyte employed was 1.0 M NaPF<sub>6</sub> in diglyme (100%). This study conducted constant current charge/discharge cycling and rate distribution tests over a voltage range of 0.01-3V using the LAND CT2001A Battery Test System. Additionally, cyclic voltammetry (CV) measurements were carried out on an electrochemical workstation with a scan rate ranging from 0.2 to 1.2 mV s<sup>-1</sup>, while electrochemical impedance spectroscopy (EIS) measurements covered a frequency range from 0.01 Hz to 10 kHz.

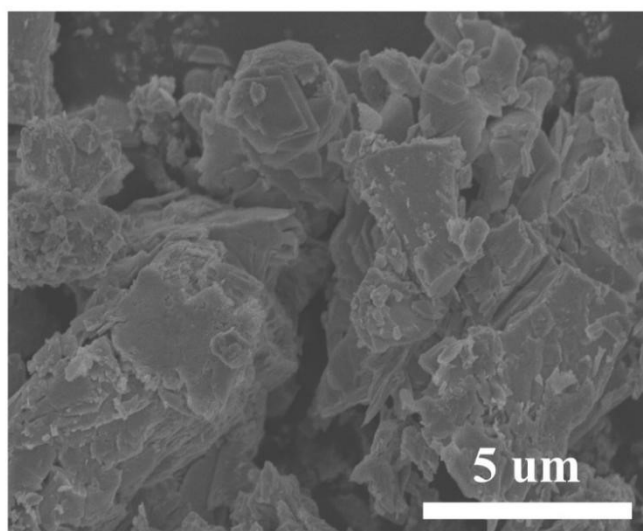

**Fig. S1.** SEM image of FeTe<sub>2</sub>

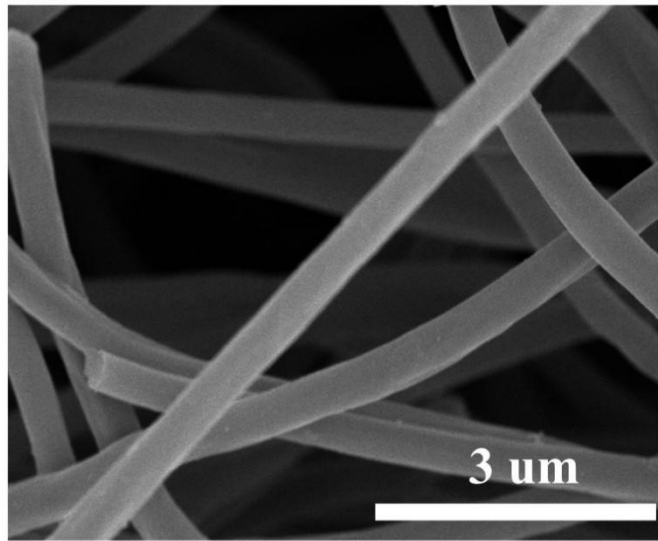

**Fig. S2.** SEM image of CNFs

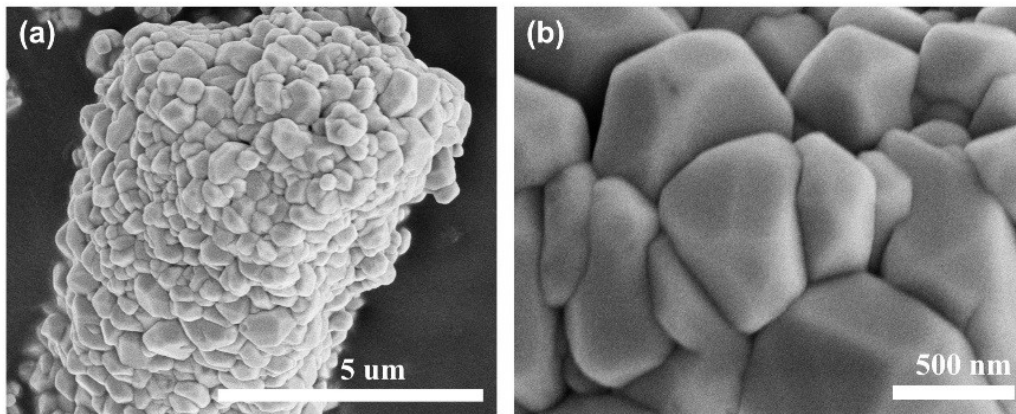

**Fig. S3.** (a-b) SEM image of tellurium powders

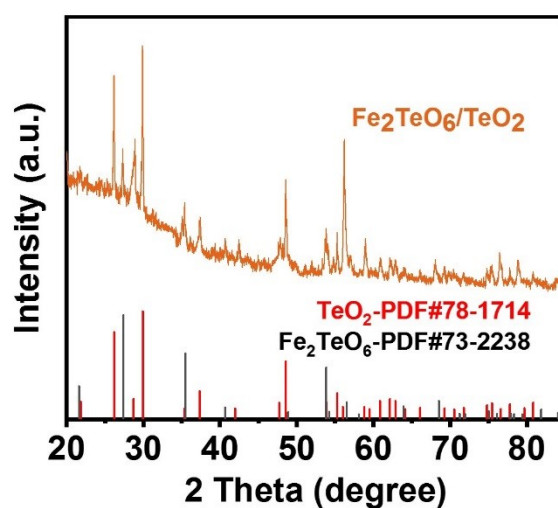

**Fig. S4.** XRD pattern of the product after heating  $\text{FeTe}_2/\text{CNFs}$  in air to  $650\text{ }^\circ\text{C}$

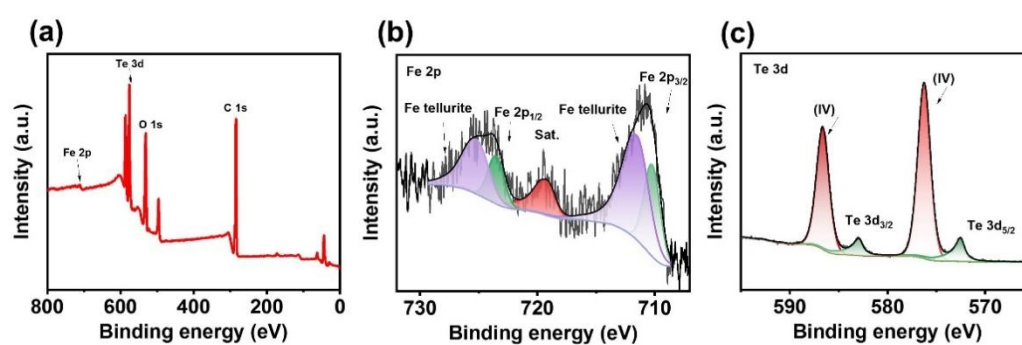

**Fig. S5.** (a) XPS total spectra of  $\text{FeTe}_2$ . High-resolution XPS spectroscopy of (b) Fe 2p, (c) Te 3d.

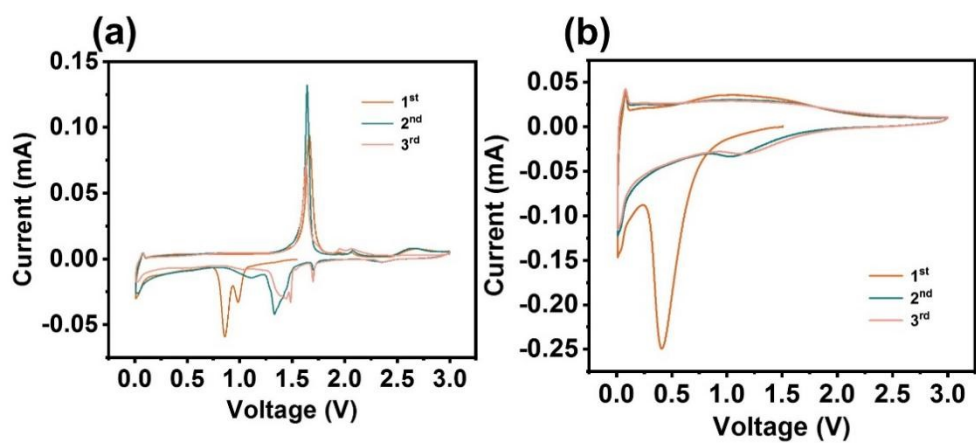

**Fig. S6.** (a) CV curves of FeTe<sub>2</sub> at 0.2 mV s<sup>-1</sup> in a voltage range of 0.01–3.0 V. (b) CV curves of CNFs at 0.2 mV s<sup>-1</sup> in a voltage range of 0.01–3.0 V.

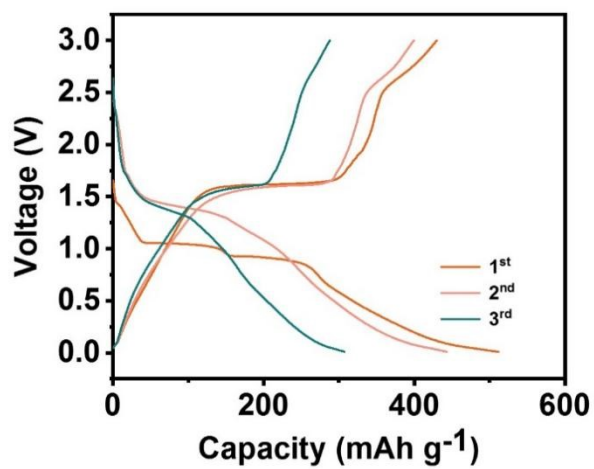

**Fig. S7.** Discharge/charge curves of FeTe<sub>2</sub> at 0.2 A g<sup>-1</sup>.

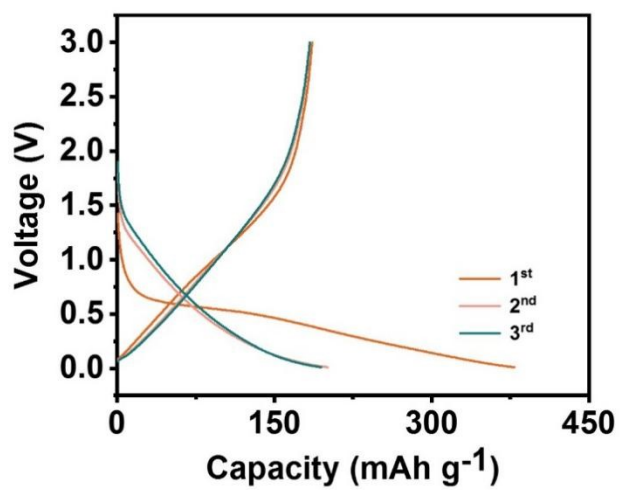

**Fig. S8.** Discharge/charge curves of CNFs at 0.2 A g<sup>-1</sup>.

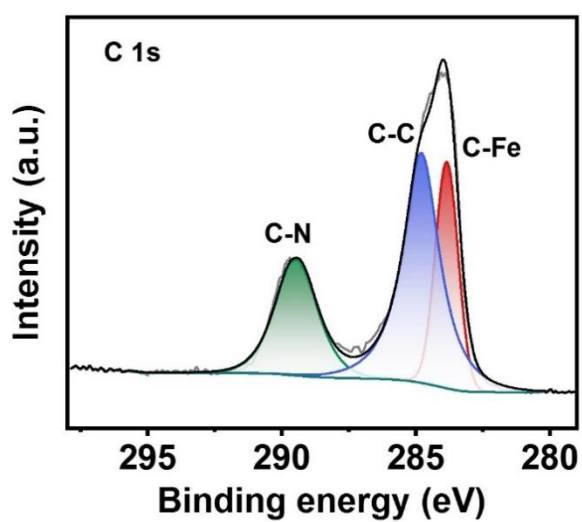

**Fig. S9.** the high-resolution C1s spectrum during the electrochemical process.

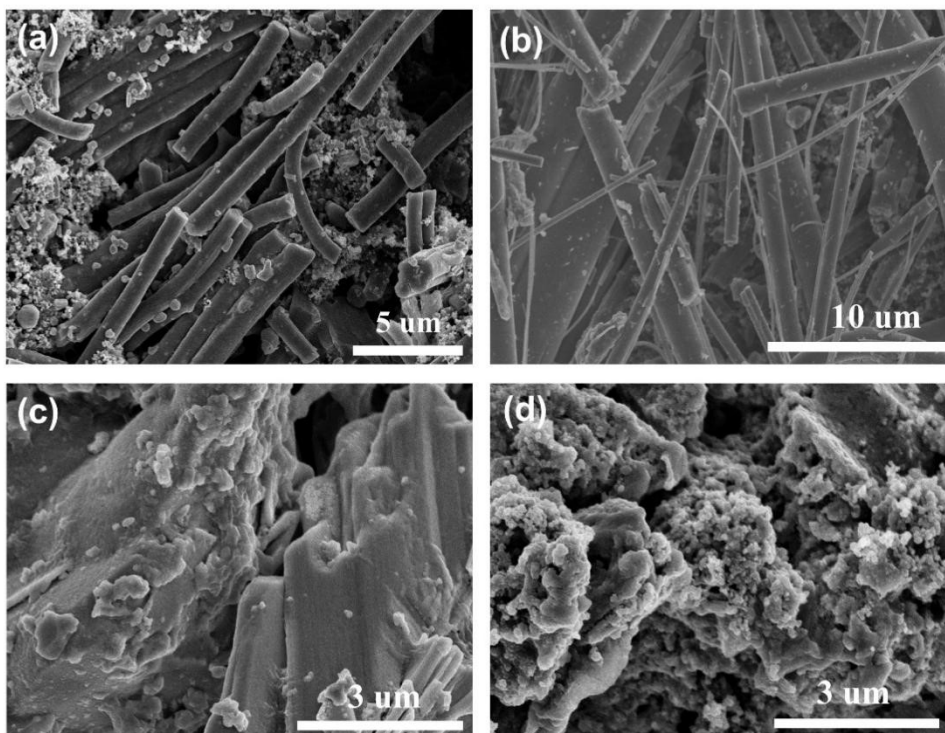

**Fig. S10.** (a) and (b) show the electron micrographs of the  $\text{FeTe}_2/\text{CNFs}$  electrode before and after one hundred cycles. (c) and (d) show the electron micrographs of the  $\text{FeTe}_2$  electrode before and after one hundred cycles.

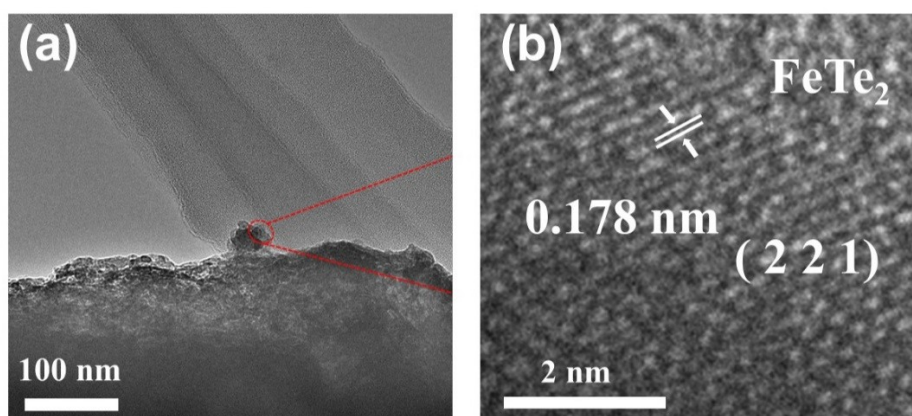

**Fig. S11.** (a) TEM images of  $\text{FeTe}_2/\text{CNFs}$  electrode cycling for 50 cycles. (b) HRTEM images of  $\text{FeTe}_2/\text{CNFs}$  electrode cycling for 50 cycles.

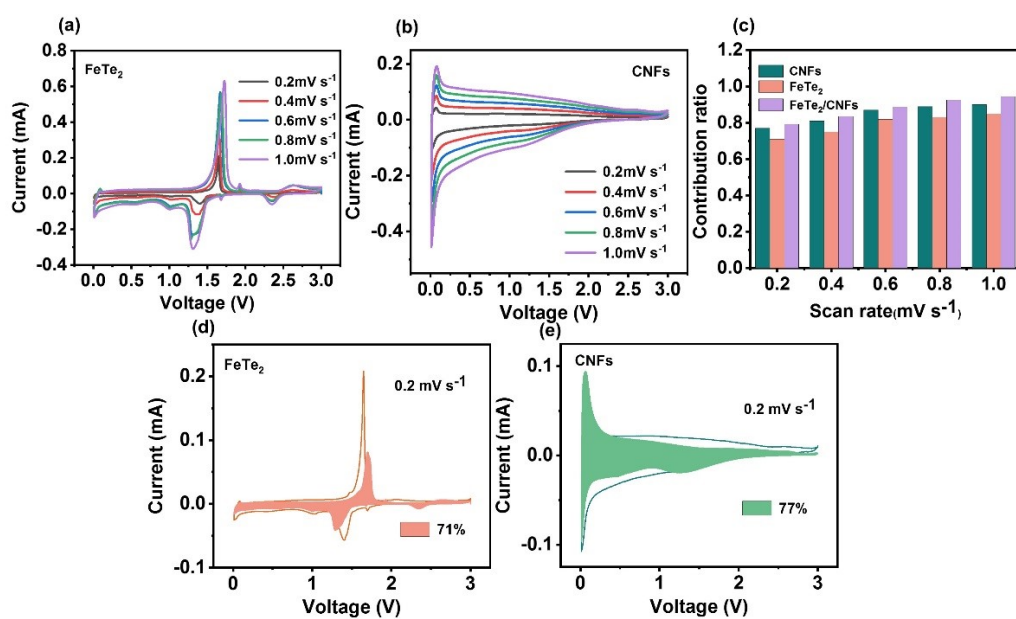

**Fig. S12.** (a-b) CV curves of FeTe<sub>2</sub> and CNFs at various scanning rates. (c) The ratio of capacitance contribution at various scan rates. (d-e) Pseudocapacitance contribution of FeTe<sub>2</sub> and CNFs at a scan rate of 0.2 mV s<sup>-1</sup>.

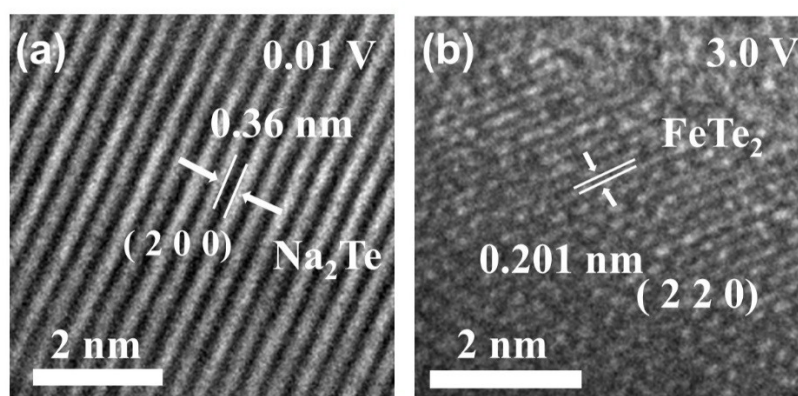

**Fig. S13.** Ex-situ HRTEM images of the FeTe<sub>2</sub>/CNFs: (a) fully discharged to 0.01 V and (b) fully charged to 3.0 V.
